# Supplementary material for: Engineering mouse chymotrypsin B1 for improved trypsinogen degradation
Source: Springer Nature journal article supplement (doi:10.1038/s41598-025-94299-1), 2025-03-25

Uncropped gel pictures for Figure 2A

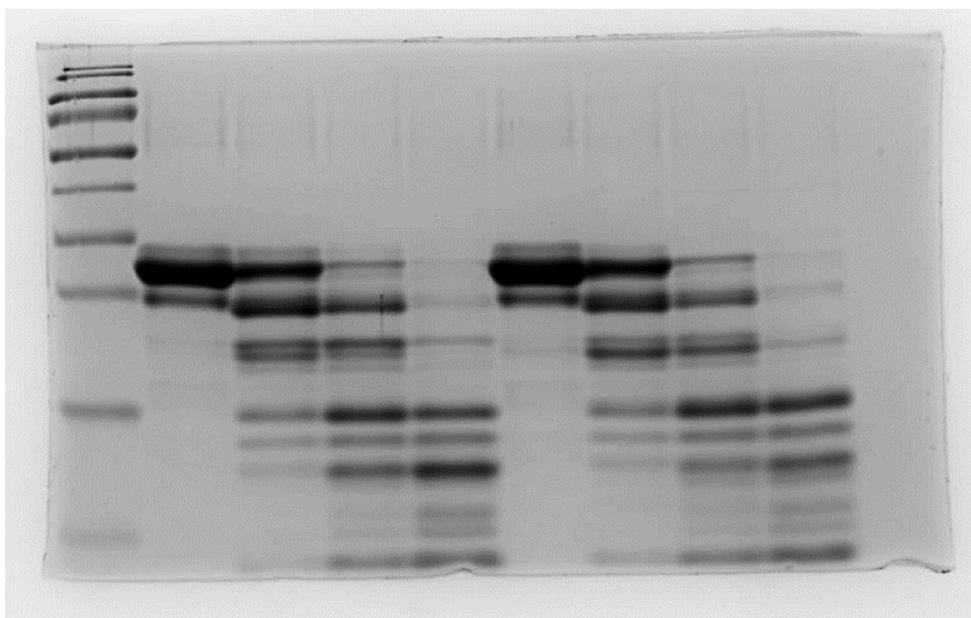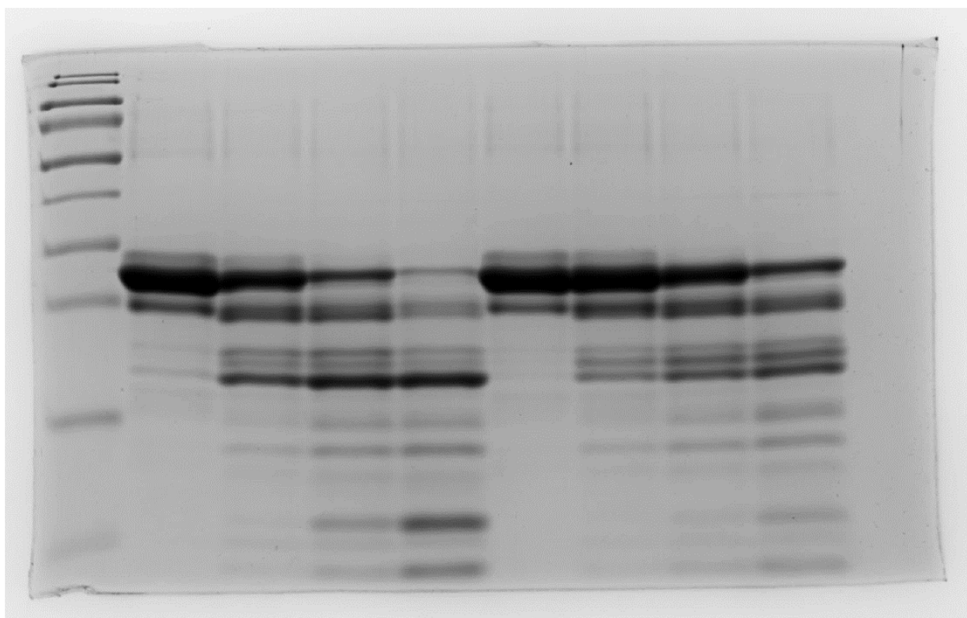

# Uncropped gel pictures for Figure 4A

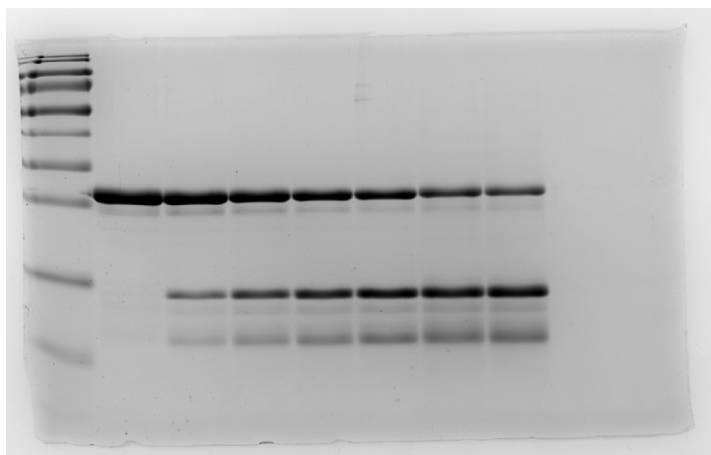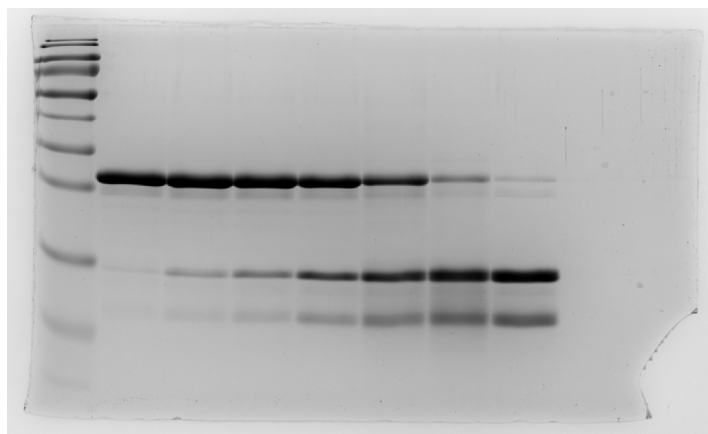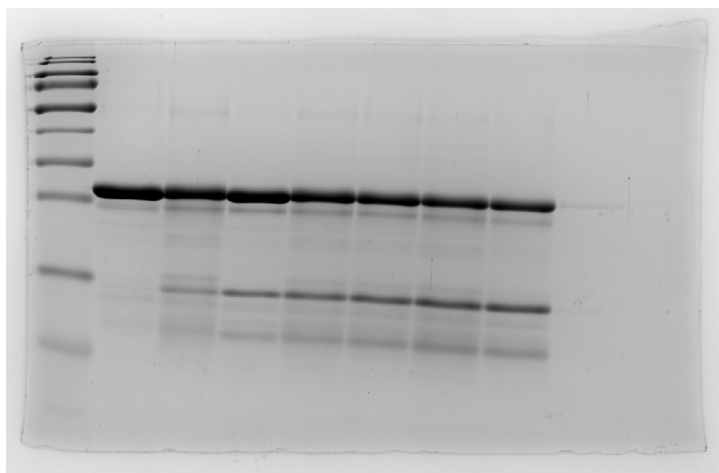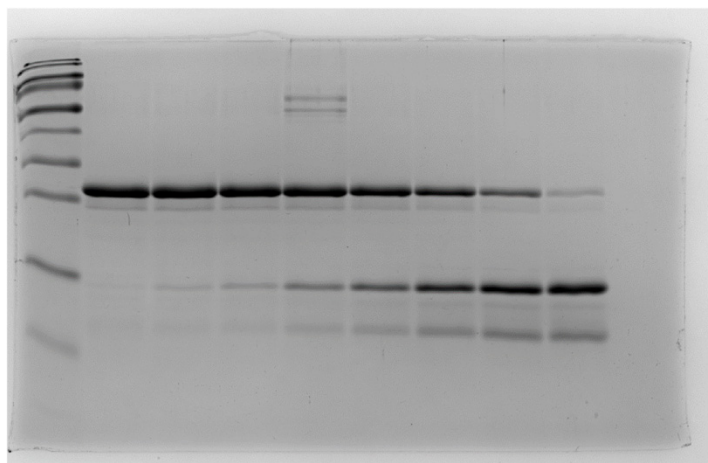

# Uncropped gel pictures for Figure 5A

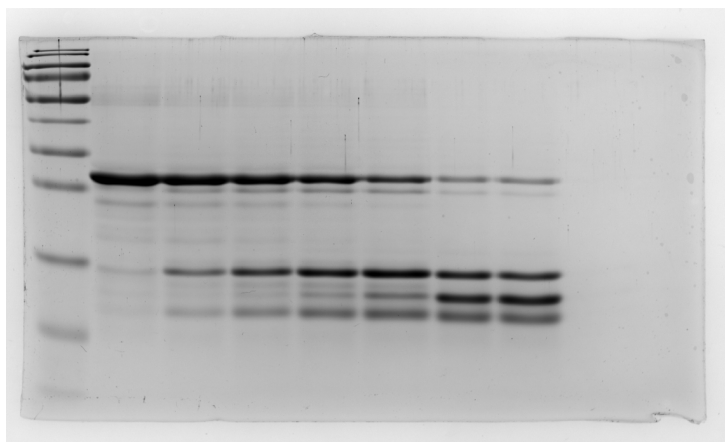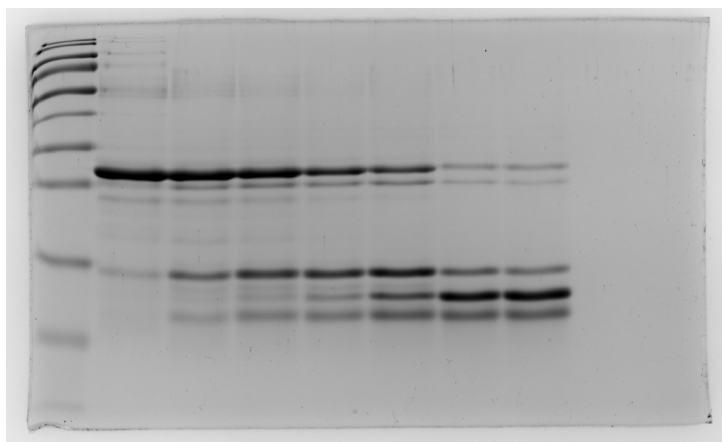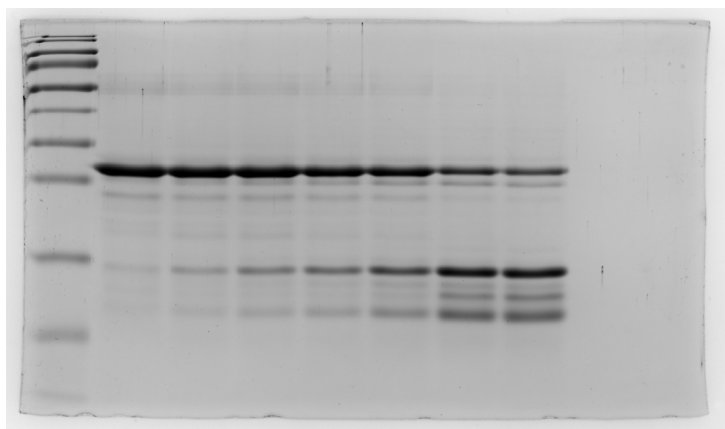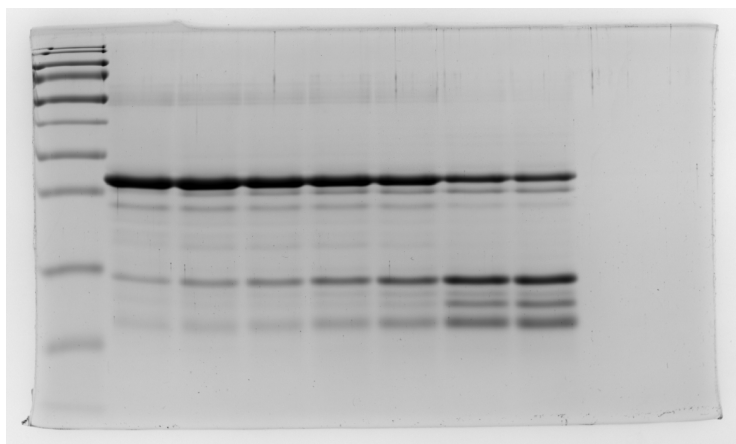

Supplement: MOESM1 [file 41598_2025_94299_MOESM1_ESM.pdf]
